# Supplementary material
Source: publisher site journal article supplement (https://www.degruyterbrill.com/publication/isbn/9783050063997/downloadAsset/9783050063997_Inhaltsverzeichnis.pdf)
Supplement: Supplementary file 1 [file 9783050063997_Inhaltsverzeichnis.pdf]

# Inhalt

*Klaus Ridder und Steffen Patzold*

|                  |   |
|------------------|---|
| Einleitung ..... | 7 |
|------------------|---|

## Eröffnung

*Jeffrey F. Hamburger und Hildegard Elisabeth Keller*

|                                                                                                                                                  |    |
|--------------------------------------------------------------------------------------------------------------------------------------------------|----|
| Bilder in der Kirche, im Herzen oder gar nirgends? Überlegungen zu<br>Periodisierungen am Beispiel des Bilderstreits in der Frühen Neuzeit ..... | 19 |
|--------------------------------------------------------------------------------------------------------------------------------------------------|----|

## Nation – Europa – Welt

*Michael Borgolte*

|                                                                                                                      |    |
|----------------------------------------------------------------------------------------------------------------------|----|
| Über europäische und globale Geschichte des Mittelalters. Historiographie<br>im Zeichen kognitiver Entgrenzung ..... | 47 |
|----------------------------------------------------------------------------------------------------------------------|----|

*Ulrich Müller*

|                                                                                                   |    |
|---------------------------------------------------------------------------------------------------|----|
| Die Archäologie des Mittelalters und der Neuzeit im Gefüge der historischen<br>Archäologien ..... | 67 |
|---------------------------------------------------------------------------------------------------|----|

## Vormoderne – Moderne

*Ewald Frie*

|                                                                                                        |    |
|--------------------------------------------------------------------------------------------------------|----|
| „Bedrohte Ordnungen“ zwischen Vormoderne und Moderne.<br>Überlegungen zu einem Forschungsprojekt ..... | 99 |
|--------------------------------------------------------------------------------------------------------|----|

*Frank Rexroth*

|                                                                                               |     |
|-----------------------------------------------------------------------------------------------|-----|
| Die scholastische Wissenschaft in den Meistererzählungen der europäischen<br>Geschichte ..... | 111 |
|-----------------------------------------------------------------------------------------------|-----|

*Joachim Knappe*

|                                                                                                             |     |
|-------------------------------------------------------------------------------------------------------------|-----|
| Textleistung. Eine moderne rhetorische Kategorie, erprobt am Beispiel<br>mittelalterlicher Chronistik ..... | 135 |
|-------------------------------------------------------------------------------------------------------------|-----|

*Wilfried Nippel*

|                                                                       |     |
|-----------------------------------------------------------------------|-----|
| Die Verabschiedung der Antike durch die Französische Revolution ..... | 161 |
|-----------------------------------------------------------------------|-----|

*Martin Baisch*

|                                                                                                                                 |     |
|---------------------------------------------------------------------------------------------------------------------------------|-----|
| Alterität und Selbstfremdheit. Zur Kritik eines zentralen<br>Interpretationsparadigmas in der germanistischen Mediävistik ..... | 185 |
|---------------------------------------------------------------------------------------------------------------------------------|-----|

*Claudia Lauer*

|                                                                                                                         |     |
|-------------------------------------------------------------------------------------------------------------------------|-----|
| Liebe übersetzt. Friedrichs von Hausen ‚Ich denke underwîlen‘<br>(MF 51,33) als (vor-)modernes Rezeptionsphänomen ..... | 207 |
|-------------------------------------------------------------------------------------------------------------------------|-----|

## Religion – Wissen

*Andreas Holzem*

|                                                                                                                    |     |
|--------------------------------------------------------------------------------------------------------------------|-----|
| Die Wissensgesellschaft der Vormoderne. Die Transfer- und<br>Transformationsdynamik des ‚religiösen Wissens‘ ..... | 233 |
|--------------------------------------------------------------------------------------------------------------------|-----|

*Michael Stolz*

|                                                                                                 |     |
|-------------------------------------------------------------------------------------------------|-----|
| Vivus est sermo tuus. Religion und Wissen in der Prager Hofkultur<br>des 14. Jahrhunderts ..... | 267 |
|-------------------------------------------------------------------------------------------------|-----|

*Burghart Wachinger*

|                                                          |     |
|----------------------------------------------------------|-----|
| Religionsgespräche in Erzählungen des Mittelalters ..... | 295 |
|----------------------------------------------------------|-----|

## Europäische Werte und Identitäten

*Dietmar Mieth*

|                                                                                                  |     |
|--------------------------------------------------------------------------------------------------|-----|
| Menschenwürde – vormoderne Perspektiven am Beispiel zweier<br>Impulse des Spätmittelalters ..... | 319 |
|--------------------------------------------------------------------------------------------------|-----|

*Klaus Oschema*

|                                                                            |     |
|----------------------------------------------------------------------------|-----|
| Ego Europa – die Zukunft eines Kontinents und der Untergang der Welt ..... | 341 |
|----------------------------------------------------------------------------|-----|

## Anhang

*Daniela Czink*

|                                         |     |
|-----------------------------------------|-----|
| Orts-, Personen- und Werkregister ..... | 375 |
|-----------------------------------------|-----|
